# Supplementary material
Source: Royal Society of Chemistry journal article supplement (doi:10.1039/d5lc01131k)

# Tumor Models for Mass Transport Studies

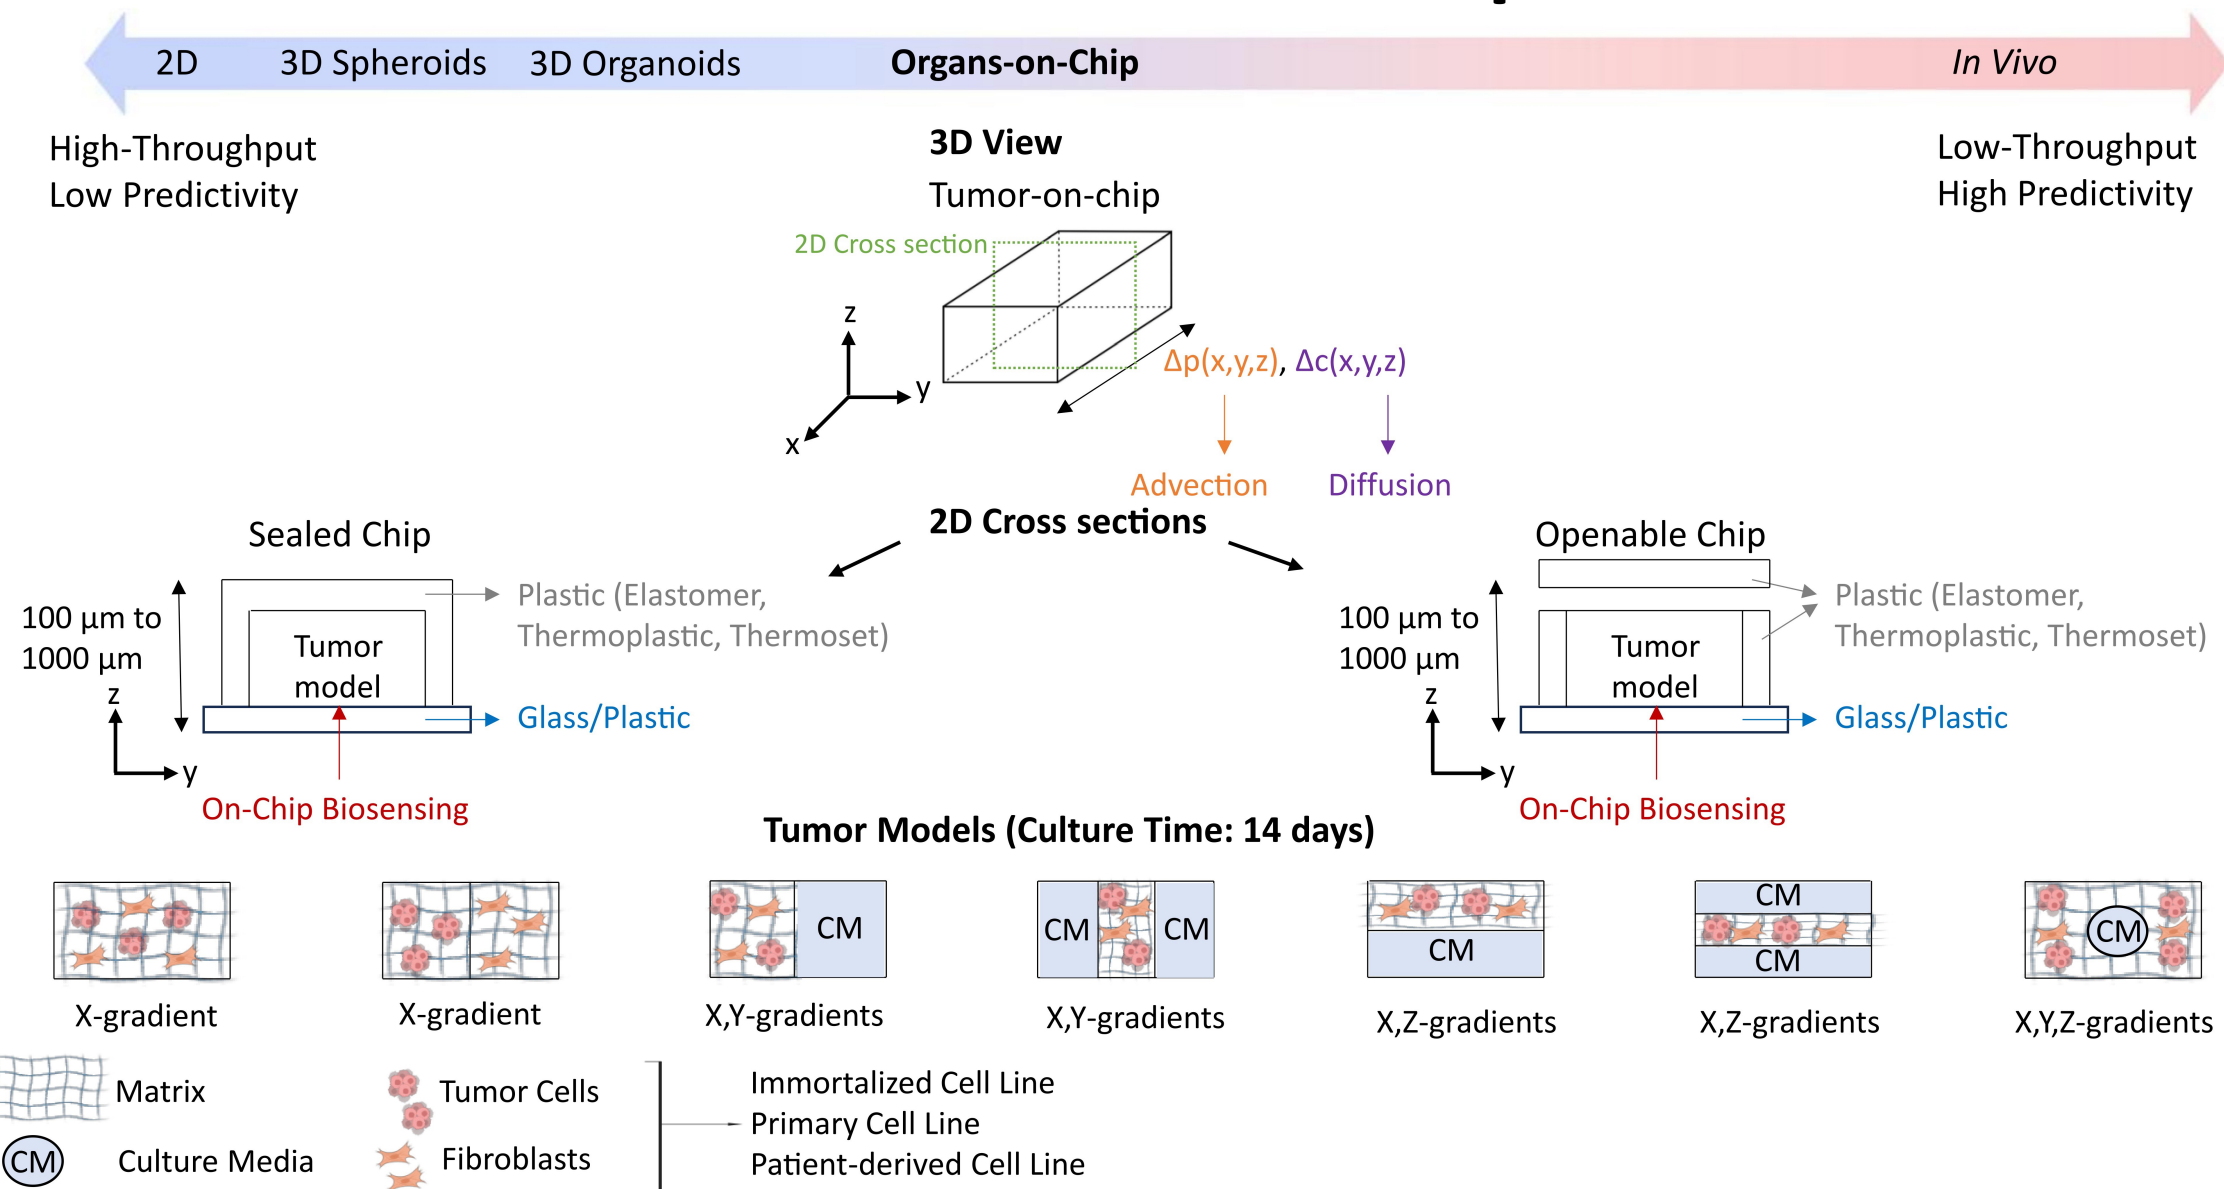

Supplement: d5lc01131k2.pdf [file d5lc01131k2.pdf]
